# Supplementary material for: Crosslinked hybrid polymer matrices with nanostructure directing abilities for lanthanum hydroxide growth
Source: Royal Society of Chemistry journal article supplement (doi:10.1039/b909923a), 2009-01-01
Supplement: b909923a.pdf [file b909923a.pdf]

## Supporting Information

### Crosslinked Hybrid Polymer Matrices with Nanostructure Directing Abilities for Lanthanide Hydroxide Growth

Claudia Feldgitscher, Herwig Peterlik, Sorin Ivanovici, Michael Puchberger  
and Guido Kickelbick\*

Experimental details: All hydrosilation reactions were carried out in flame dried Schlenk tubes under Ar atmosphere. The ratio between  $\alpha,\omega$ -diallyl poly(ethylene oxides) (aPEO) and PDMS-PMHS (polydimethyl-co-polymethylhydrido siloxane trimethylsilyl terminated ( $M_w = 950\text{ g/mol}$ )) or PMHS (polymethylhydridosiloxane ( $M_w = 1700\text{--}3200\text{ g/mol}$ )) were adjusted to EO:Si of 4.42 and 5.68 respectively.

A typical preparation procedure was as follows: 0.950 g PDMS-PMHS (1 mmol, 1 eq) and 2.8 g aPEO (4.3 mmol, 4.3 eq) were dissolved in 7.5 mL toluene and 4.5 mL THF in a Schlenk flask. A solution of Karstedt catalyst in THF (2 mM) was prepared and 1.5 mL of this solution were added to the reaction mixture. After stirring for 18 h the solvent was evaporated and the crosslinked polymer dried in vacuum.

The dried polymers were infiltrated with solutions of  $\text{La}(\text{NO}_3)_3$  in methanol (0.15 M). The samples were infiltrated under ultrasonic treatment for 3 h. After infiltration the polymer samples were washed and dried.

The thus infiltrated polymer sample was put into a 0.3 M solution of  $\text{NH}_3$  in methanol and kept there for 3 h. After washing and drying under vacuum, the samples were put into an autoclave into 5 mL of water. The autoclave was heated to  $120^\circ\text{C}$  and kept at that temperature for 18 h.

#### Preparation of the $\text{La}(\text{OH})_3$ nanostructures

0.48 g of functionalized polymer was put into 3 mL of 0.15 M  $\text{La}(\text{NO}_3)_3$  solution (in MeOH) and kept in the ultrasonic bath for 3 h. The supernatant solution was decanted and the polymer sample washed with methanol and distilled water 2 times. 0.30 g of the infiltrated sample were put into 3 mL of a 0.3 M solution of  $\text{NH}_3$ /methanol. After 3 h the polymer was washed 3 times with methanol and distilled water and subsequently dried under vacuum. 0.12 g of this polymer was put into an autoclave filled with distilled water (5 mL). The autoclave was heated

to 120 °C and kept at that temperature for 18 h. The sample was removed and washed 3 times with distilled water.

#### Characterization based on lanthanum-doped PMHS2

##### Neat polymer:

ATR-FTIR:  $\nu$  = 697 (C-Si-C), 799 (C-Si-C), 843 ( $\nu$ CO, rCH<sub>2</sub>), 948, 1015 ( $\nu$ CO,  $\nu$ CC, rCH<sub>2</sub>, Si-O-Si), 1090 ( $\nu$ CO), 1259 ( $\nu$ Si-CH<sub>3</sub>, CH<sub>2</sub> twisting), 1350 (CH<sub>2</sub> wagging), 1412 (CH<sub>2</sub>), 1456 (CH<sub>2</sub> scissoring), 1951, 2867 ( $\nu$ sCH<sub>2</sub>) and 3515

<sup>13</sup>C CP/MAS (25 °C):  $\delta$  = 71.3 (OCH<sub>2</sub>CH<sub>2</sub>O), 68.2 (OCH<sub>2</sub>CH<sub>2</sub>O), 21.0 (CH<sub>2</sub>CH<sub>2</sub>CH<sub>2</sub>O), 11.3 (Si-CH<sub>2</sub>-CH<sub>2</sub>), -1.2 (Si-CH<sub>3</sub>), -2.6 (Si-CH<sub>3</sub>), -4.7 (H-Si-CH<sub>3</sub>)

<sup>29</sup>Si HPdec/MAS (25 °C)  $\delta$  = 8.0 (CH<sub>3</sub>)SiO, M<sup>1</sup>), -21.8 (OSi(CH<sub>3</sub>)<sub>2</sub>, D<sup>2</sup>), -57.6 (SiO<sub>3</sub>CH<sub>3</sub>, T<sup>2</sup>), -67.2 (SiO<sub>3</sub>CH<sub>3</sub>, T<sup>3</sup>)

##### Infiltrated:

ATR-FTIR:  $\nu$  = 687 (C-Si-C), 735 (C-Si-C), 799, 843 ( $\nu$ CO, rCH<sub>2</sub>), 952, 1029 ( $\nu$ CO,  $\nu$ CC, rCH<sub>2</sub>, Si-O-Si), 1073 ( $\nu$ CO coordinated), 1260 ( $\nu$ Si-CH<sub>3</sub>, CH<sub>2</sub> twisting), 1301, 1350 (CH<sub>2</sub> wagging), 1453 (CH<sub>2</sub> scissoring, NO<sub>2</sub> stretching), 1650 (N=O  $\nu_1$  out of plane ( $\delta$ H<sub>2</sub>O)), 1726 (C=O), 2875 ( $\nu$ sCH<sub>2</sub>) and 3413 cm<sup>-1</sup> (OH).

<sup>13</sup>C CP/MAS (25 °C):  $\delta$  = 170 (C=O), 154 (C=O), 63.6 (OCH<sub>2</sub>CH<sub>2</sub>O), 55.4 (-OCH<sub>2</sub>CH<sub>2</sub>O-coordinated), 20.5, 16.3 (CH<sub>2</sub>CH<sub>2</sub>CH<sub>2</sub>O), 6.4 (Si-CH<sub>2</sub>-CH<sub>2</sub>), -6.0 ppm (Si-CH<sub>3</sub>).

<sup>29</sup>Si HPdec/MAS (25 °C):  $\delta$  = 8.2 (CH<sub>3</sub>)SiO, M<sup>1</sup>), -21.7 (OSi(CH<sub>3</sub>)<sub>2</sub>, D<sup>2</sup>), -65.2 ppm (SiO<sub>3</sub>CH<sub>3</sub>, T<sup>3</sup>).

##### Precipitated:

ATR-FTIR:  $\nu$  = 678, 799, 843 ( $\nu$ CO, rCH<sub>2</sub>), 950, 1022 ( $\nu$ CO,  $\nu$ CC, rCH<sub>2</sub>, Si-O-Si), 1087 ( $\nu$ CO), 1259 ( $\nu$ Si-CH<sub>3</sub>, CH<sub>2</sub> twisting), 1305, 1325, 1347 (CH<sub>2</sub> wagging), 1452 (CH<sub>2</sub> scissoring, NO<sub>2</sub> stretching), 1645 (N=O  $\nu_1$  out of plane ( $\delta$ H<sub>2</sub>O)), 1949, 2867 ( $\nu$ sCH<sub>2</sub>), 3593 cm<sup>-1</sup> (OH).

<sup>13</sup>C CP/MAS (25 °C):  $\delta$  = 64.5 (OCH<sub>2</sub>CH<sub>2</sub>O), 17.3 (CH<sub>2</sub>CH<sub>2</sub>CH<sub>2</sub>O), 7.6 (Si-CH<sub>2</sub>-CH<sub>2</sub>), -4.8 (Si-CH<sub>3</sub>), -6.4 ppm (Si-CH<sub>3</sub>).

$^{29}\text{Si}$  HPdec/MAS (25 °C)  $\delta$  = 8.5 ((CH<sub>3</sub>)SiO, M<sup>1</sup>), -13.4, -20.8 (OSi(CH<sub>3</sub>)<sub>2</sub>, D<sup>2</sup>), -56.8 ppm (SiO<sub>3</sub>CH<sub>3</sub>, T<sup>2</sup>).

Hydrothermally treated:

ATR-FTIR:  $\nu$  = 683, 798 (C-Si-C), 844 ( $\nu\text{CO}$ , rCH<sub>2</sub>), 949, 1015 ( $\nu\text{CO}$ ,  $\nu\text{CC}$ , rCH<sub>2</sub>, Si-O-Si), 1089 ( $\nu\text{CO}$ ), 1259 ( $\nu\text{Si-CH}_3$ , CH<sub>2</sub> twisting), 1350 (CH<sub>2</sub> wagging), 1413, 1454 (CH<sub>2</sub> scissoring), 1563, 1727 (C=O), 1945, 2870 ( $\nu\text{sCH}_2$ ) 3411 cm<sup>-1</sup> (OH).

Characterization of PMHS1:

Neat Polymer:

ATR-FTIR: (cm<sup>-1</sup>) 771 (C-Si-C), 794 (C-Si-C), 842 ( $\nu\text{CO}$ , rCH<sub>2</sub>), 948, 1026 ( $\nu\text{CO}$ ,  $\nu\text{CC}$ , rCH<sub>2</sub>, Si-O-Si), 1093 (shoulder,  $\nu\text{CO}$ ), 1260 ( $\nu\text{Si-CH}_3$ , CH<sub>2</sub> twisting), 1349 (CH<sub>2</sub> twisting), 1411 (CH<sub>2</sub> wagging), 1455 (CH<sub>2</sub> scissoring), 1667, 2150 (Si-H), 2866 ( $\nu\text{sCH}_2$ ) and 3524 (OH)

$^{13}\text{C}$  CP/MAS (25 °C):  $\delta$  = 67.0 (OCH<sub>2</sub>CH<sub>2</sub>O), 64.2 (OCH<sub>2</sub>CH<sub>2</sub>O), 16.9 (CH<sub>2</sub>CH<sub>2</sub>CH<sub>2</sub>O), 7.1 (Si-CH<sub>2</sub>-CH<sub>2</sub>), -4.7 ((Si-CH<sub>3</sub>)<sub>3</sub>), -6.9 (Si-CH<sub>3</sub>), -9.5 (H-Si-CH<sub>3</sub>)

$^{29}\text{Si}$  HPdec/MAS (25 °C)  $\delta$  =: 8.4 (CH<sub>3</sub>)SiO, M<sup>1</sup>), -21.6 (OSi(CH<sub>3</sub>)<sub>2</sub>, D<sup>2o</sup>), -37.1 (OSi(CH<sub>3</sub>)H, D<sup>H</sup>), -57.9 (SiO<sub>3</sub>CH<sub>3</sub>, T<sup>2</sup>), -66.5 (SiO<sub>3</sub>CH<sub>3</sub>, T<sup>3</sup>)

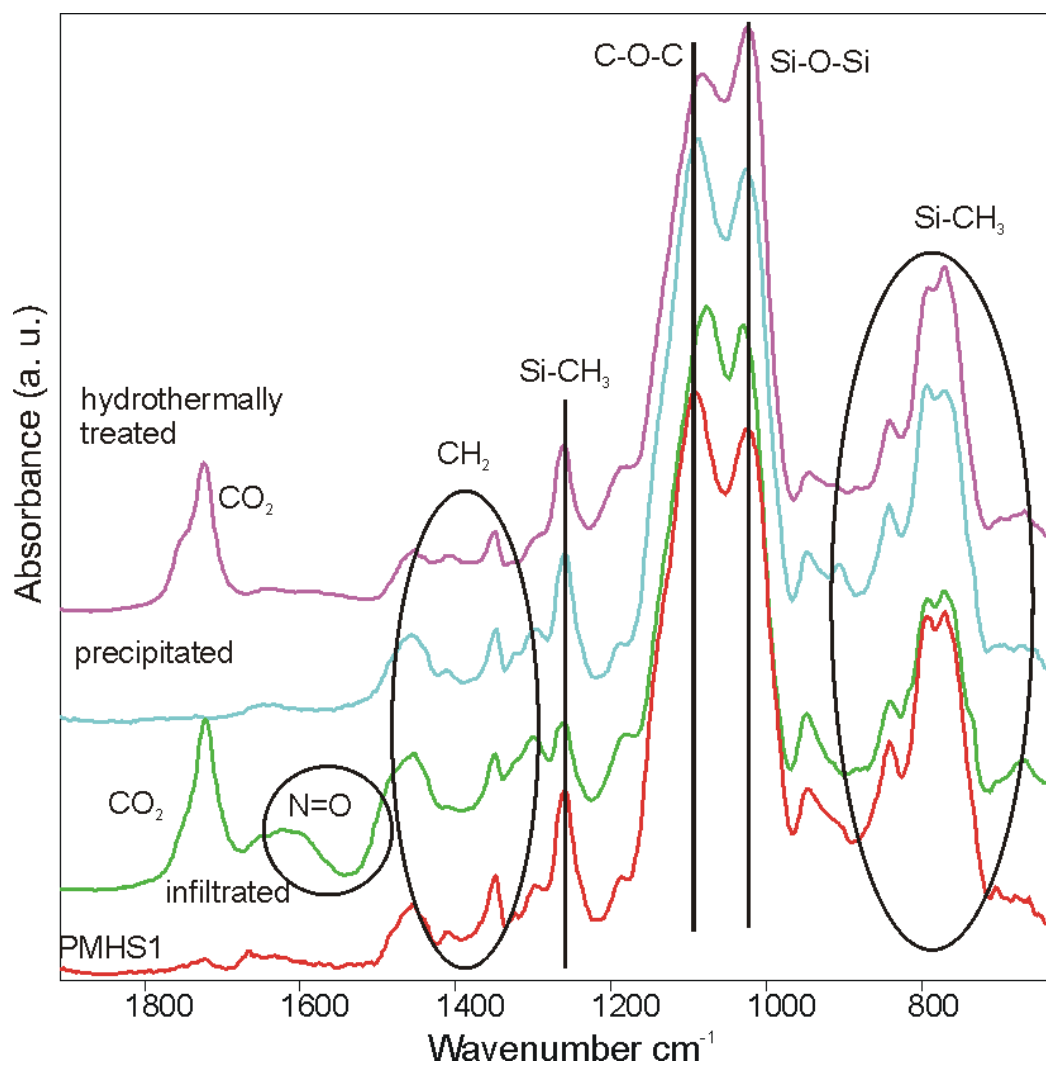

**Figure I:** FT-IR of neat PMHS1 and La-doped PMHS1 following the nanoparticle preparation

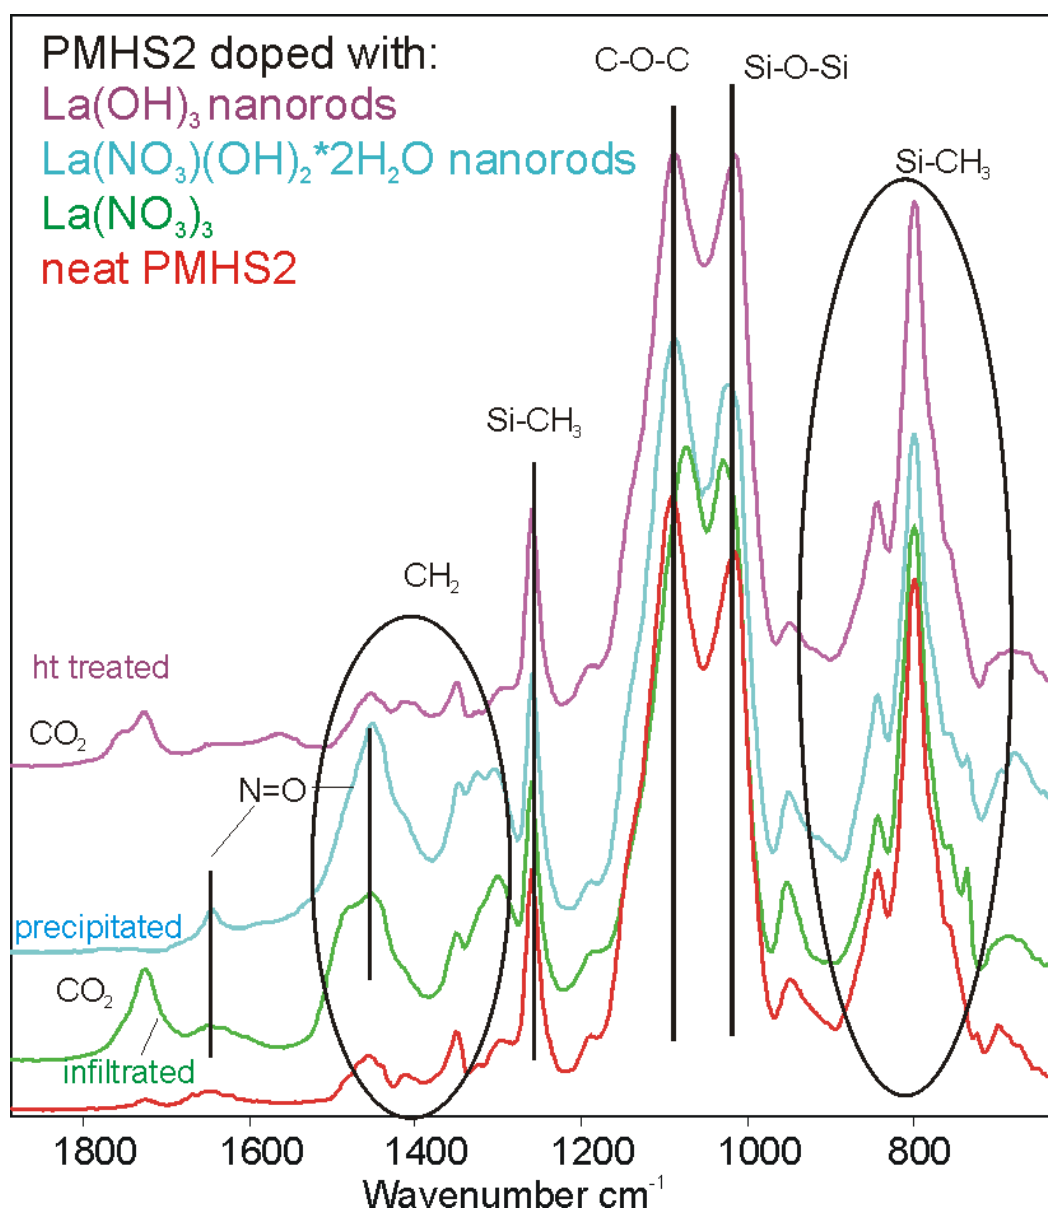

Figure II: FT-IR spectra of PMHS2 and La-doped PMHS2

a)

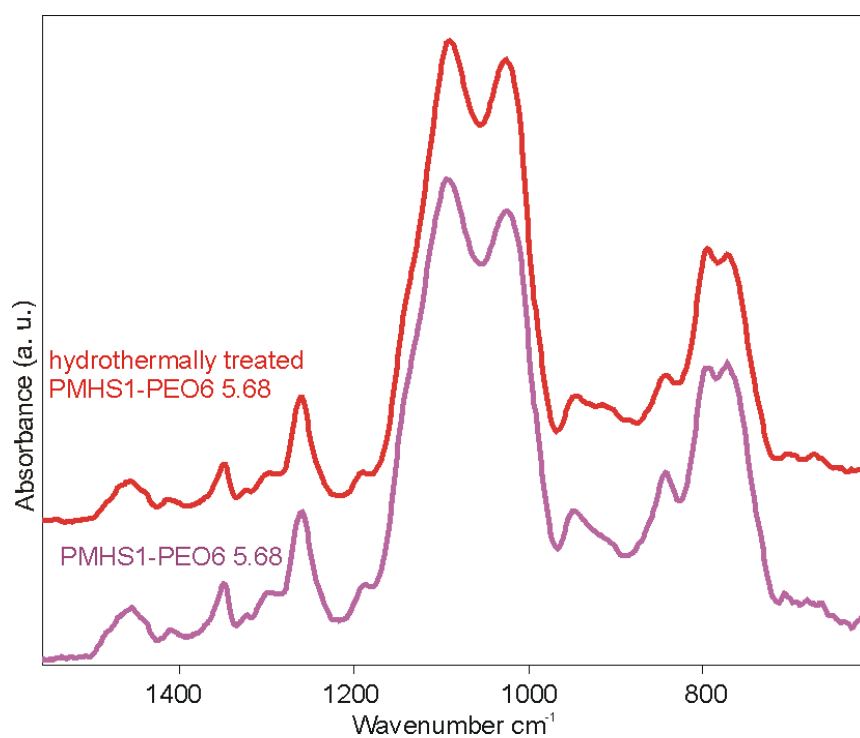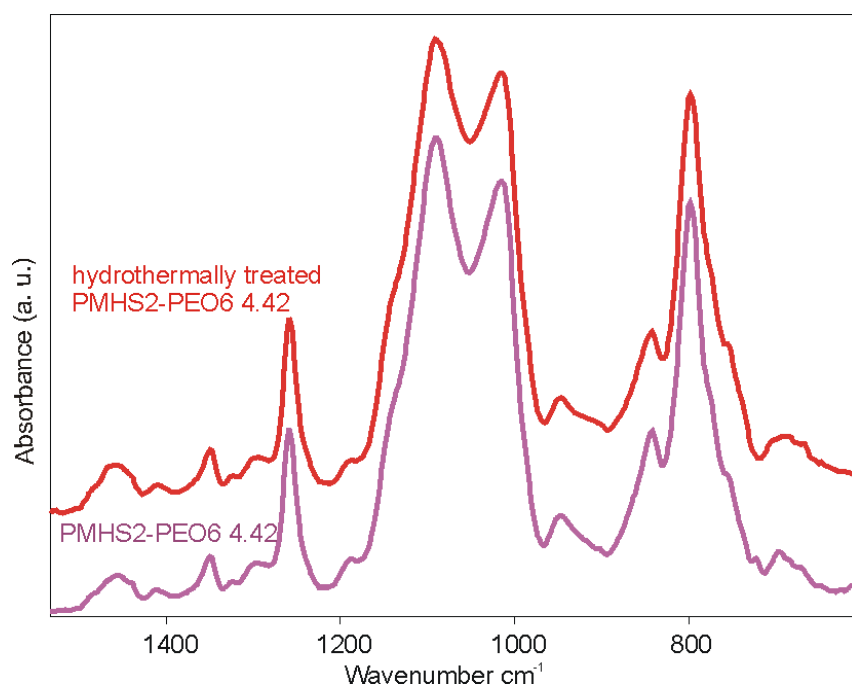

**Figure III: FT-IR spectra of (a) neat and hydrothermally treated PMHS1-PEO6 5.68 and (b) neat and hydrothermally treated PMHS2-PEO4 4.42**

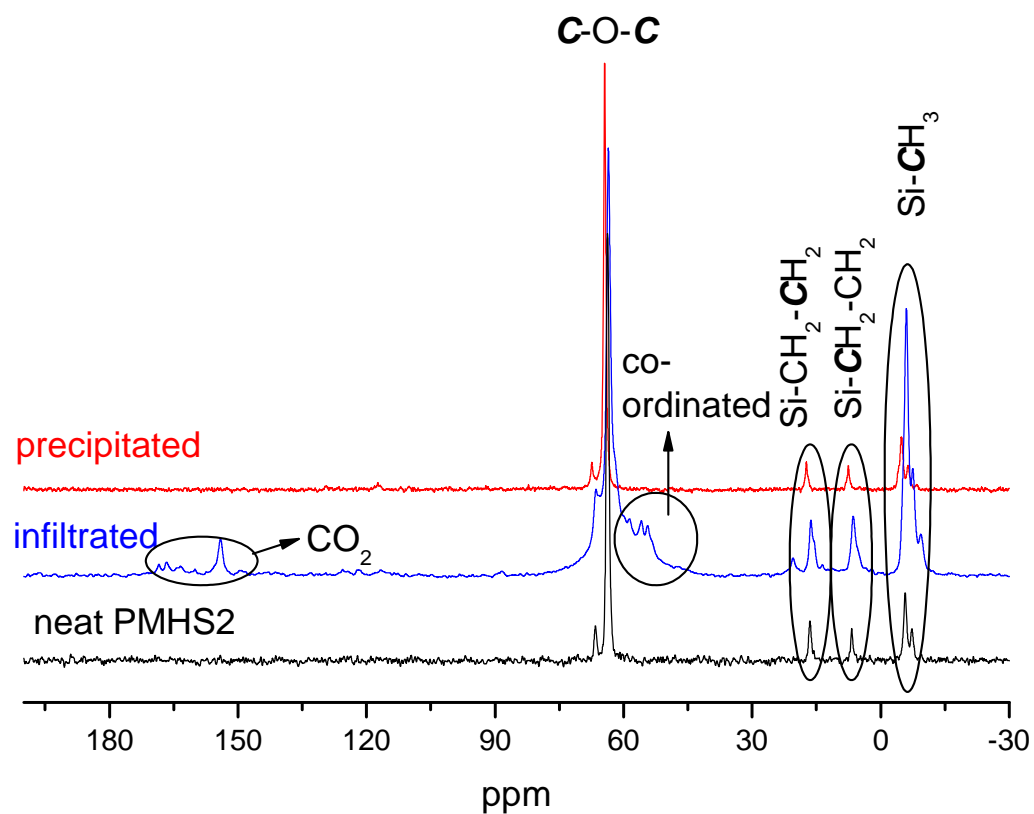

**Figure IV:**  $^{13}\text{C}$ -HPdec/MAS-NMR of neat PMHS2, infiltrated with  $\text{La}(\text{NO}_3)_3$  and precipitated with ammonia resulting in  $\text{La}(\text{NO}_3)(\text{OH})_2 \cdot 2\text{H}_2\text{O}$  nanorod containing PMHS2. No changes in the polymer matrix, like formation of carboxylates, were observed.

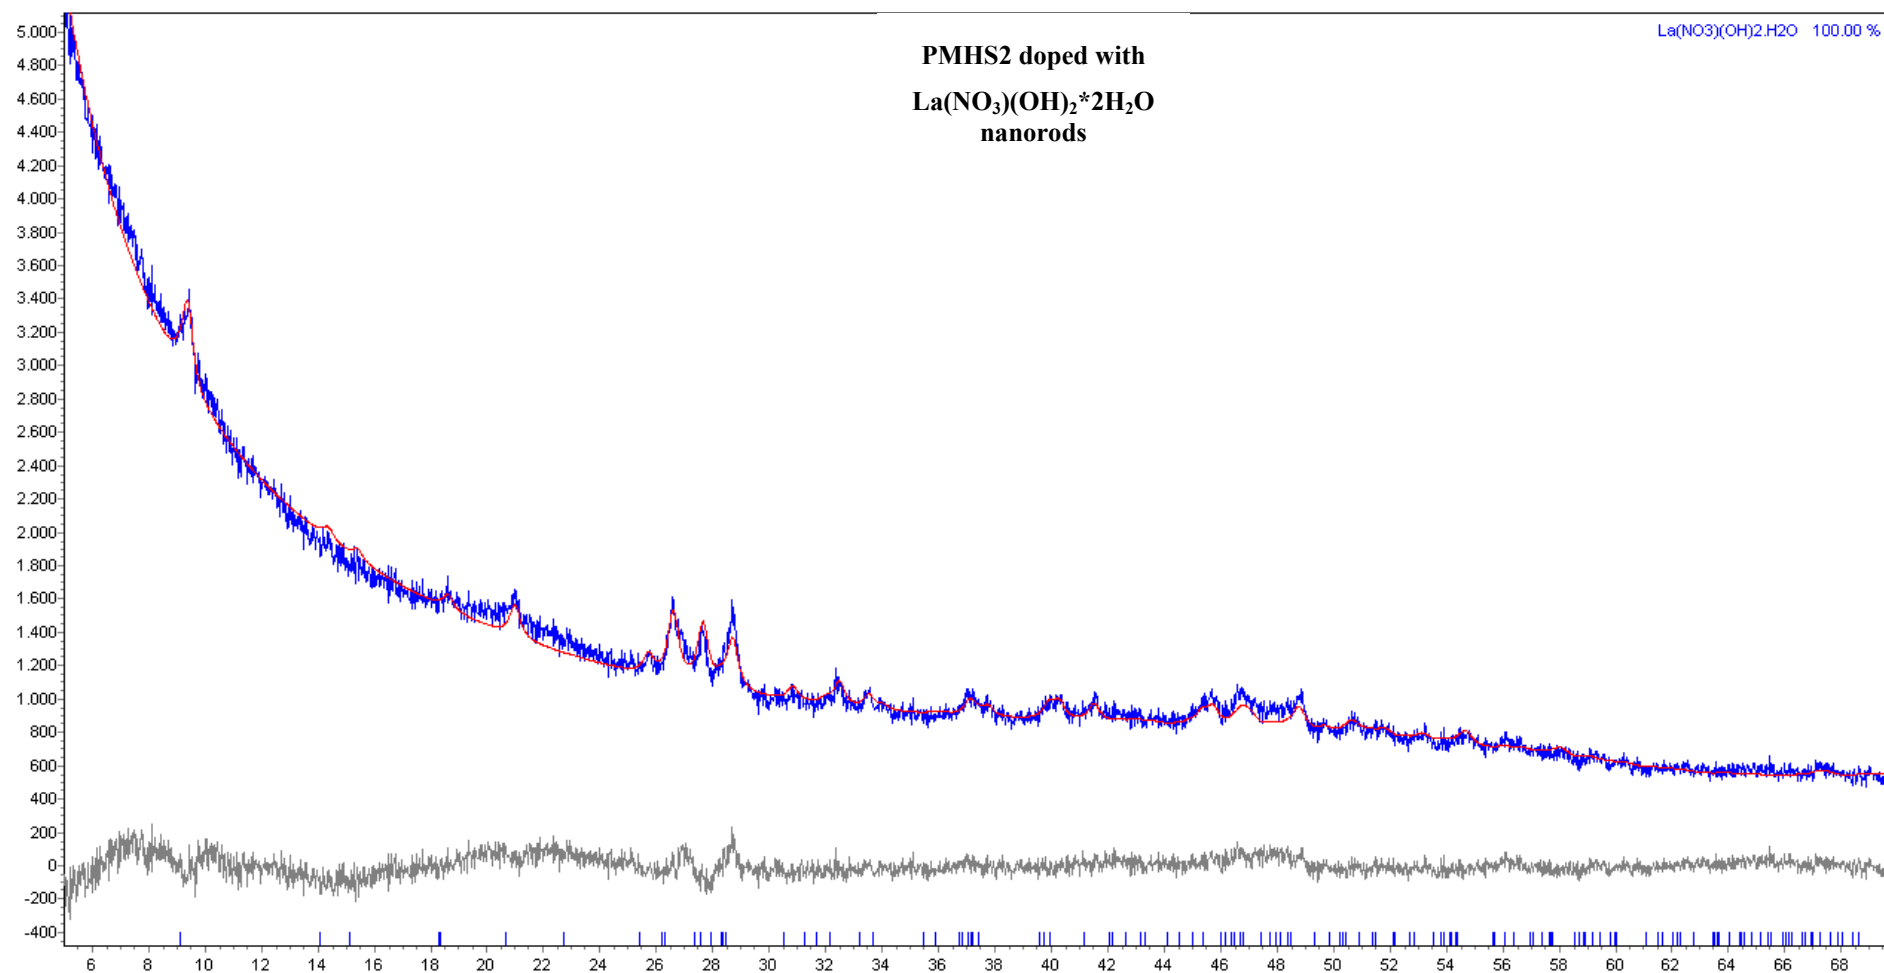

**Figure V:** XRD pattern of precipitated PMHS2 (PMHS2 doped with  $\text{La}(\text{NO}_3)(\text{OH})_2 \cdot 2\text{H}_2\text{O}$  nanorods) and the fitted pattern textured in 100 directions of  $\text{La}(\text{NO}_3)(\text{OH})_2 \cdot 2\text{H}_2\text{O}$  (red line)

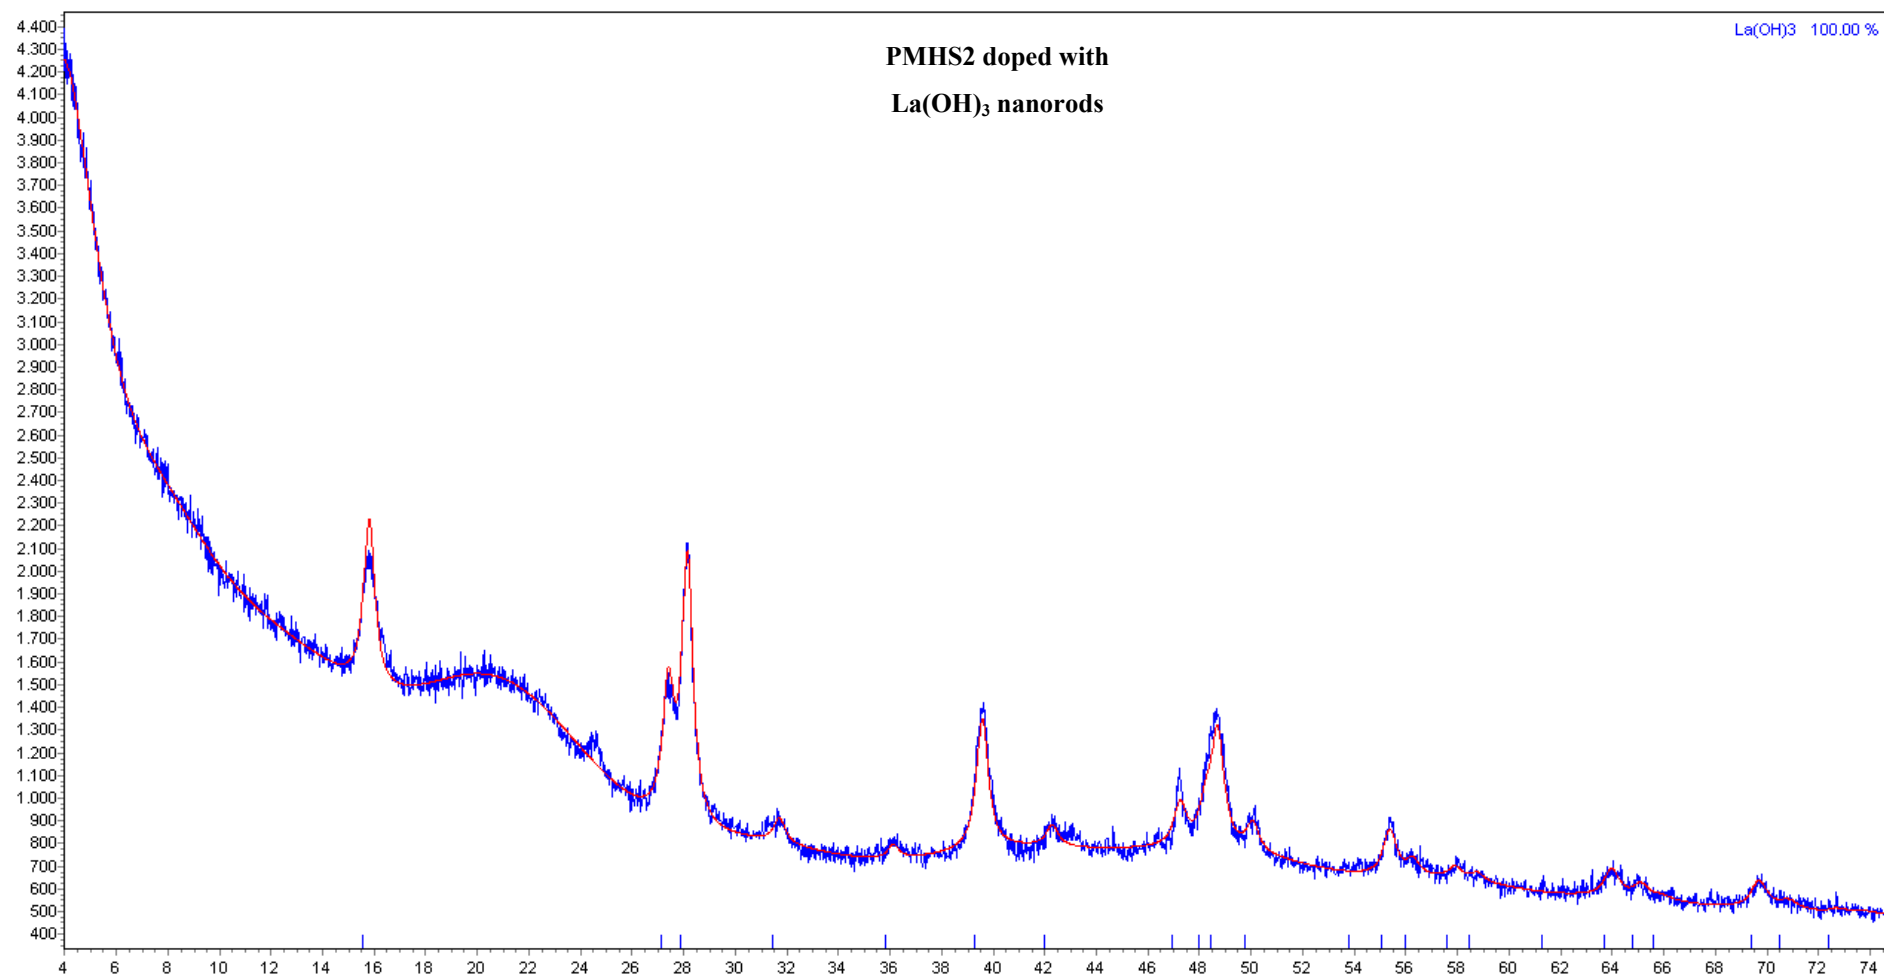

**Figure VI:** XRD pattern of La-doped PMHS2 after ht treatment (PMHS2 doped with La(OH)<sub>3</sub> nanorods) and the fitted pattern textured in 100 directions of La(OH)<sub>3</sub> (red line)
